# Supplementary material
Source: Research Square preprint supplement (doi:10.21203/rs.3.rs-9509092/v1)
Supplement: Supplementary file 2 [file 7f11efddcfb24ef49eafcd76.pdf]

## **Appendix E — Scoring tables**

The following tables present the complete item-level response data for all participants. Table 1 shows responses and total scores for LLM participants under full conditions (phase 1). Table 2 shows responses and total scores for LLM participants under answer-only conditions (phase 2). Table 3 shows responses and total scores for human participants under full conditions. The correct answer for each item is indicated in the header row of each table. All responses are reproduced exactly as recorded, without correction or exclusion.

**Table 1**

Full conditions, LLMs

|           | 1        | 2        | 3        | 4        | 5        | 6        | 7        | 8        | 9        | 10       | 11       | 12       | 13       | 14       | 15       | 16       | 17       | 18       | 19       | 20       | T  |
|-----------|----------|----------|----------|----------|----------|----------|----------|----------|----------|----------|----------|----------|----------|----------|----------|----------|----------|----------|----------|----------|----|
| <b>CA</b> | <b>A</b> | <b>C</b> | <b>A</b> | <b>B</b> | <b>C</b> | <b>B</b> | <b>B</b> | <b>C</b> | <b>A</b> | <b>B</b> | <b>A</b> | <b>C</b> | <b>C</b> | <b>C</b> | <b>A</b> | <b>C</b> | <b>A</b> | <b>B</b> | <b>B</b> | <b>A</b> |    |
| D1        | A        | C        | A        | B        | C        | B        | B        | C        | A        | B        | A        | C        | C        | C        | A        | C        | A        | B        | B        | A        | 20 |
| D2        | A        | C        | A        | B        | C        | B        | B        | C        | A        | B        | A        | C        | C        | C        | A        | C        | A        | B        | B        | A        | 20 |
| D3        | A        | C        | A        | B        | C        | B        | B        | C        | A        | B        | A        | C        | C        | C        | A        | C        | A        | B        | B        | A        | 20 |
| D4        | A        | C        | A        | B        | C        | B        | B        | C        | A        | B        | A        | C        | C        | C        | A        | C        | A        | B        | B        | A        | 20 |
| D5        | A        | C        | A        | B        | C        | B        | B        | C        | A        | B        | A        | C        | C        | C        | A        | C        | A        | B        | B        | A        | 20 |
| Q1        | A        | C        | A        | B        | C        | B        | B        | C        | A        | B        | A        | C        | C        | C        | A        | C        | A        | B        | B        | A        | 20 |
| Q2        | A        | C        | A        | B        | C        | B        | B        | C        | A        | B        | A        | C        | C        | C        | B        | C        | A        | B        | B        | A        | 19 |
| Q3        | A        | C        | A        | B        | C        | B        | B        | C        | A        | B        | A        | C        | C        | C        | B        | C        | A        | B        | B        | A        | 19 |
| Q4        | A        | C        | A        | B        | C        | B        | B        | C        | A        | B        | A        | C        | C        | C        | B        | C        | A        | B        | B        | A        | 19 |
| Q5        | A        | C        | A        | B        | C        | B        | B        | C        | A        | B        | A        | C        | C        | C        | A        | C        | A        | B        | B        | A        | 20 |
| M1        | A        | C        | A        | B        | C        | B        | B        | C        | A        | B        | A        | C        | C        | C        | A        | C        | A        | B        | B        | A        | 20 |
| M2        | A        | C        | A        | B        | C        | B        | B        | C        | A        | B        | A        | C        | C        | C        | A        | C        | A        | B        | B        | A        | 20 |
| M3        | A        | C        | A        | B        | C        | B        | B        | C        | A        | B        | A        | C        | C        | C        | A        | C        | A        | B        | B        | A        | 20 |
| M4        | A        | C        | A        | B        | C        | B        | B        | C        | A        | B        | A        | C        | C        | C        | A        | C        | A        | B        | B        | A        | 20 |
| M5        | A        | C        | A        | B        | C        | B        | B        | C        | A        | B        | A        | C        | C        | C        | A        | C        | A        | B        | B        | A        | 20 |
| G1        | A        | C        | A        | B        | C        | B        | B        | C        | A        | B        | A        | C        | C        | C        | A        | C        | A        | B        | B        | A        | 20 |
| G2        | A        | C        | A        | B        | C        | B        | B        | C        | A        | B        | A        | C        | C        | C        | B        | C        | A        | B        | B        | A        | 19 |
| G3        | A        | C        | A        | B        | C        | B        | B        | C        | A        | B        | A        | C        | C        | C        | A        | C        | A        | B        | B        | A        | 20 |
| G4        | A        | C        | A        | B        | C        | B        | B        | C        | A        | B        | A        | C        | C        | C        | B        | C        | A        | B        | B        | A        | 19 |
| G5        | A        | C        | A        | B        | C        | B        | B        | C        | A        | B        | A        | C        | C        | C        | A        | C        | A        | B        | B        | A        | 20 |
| X1        | A        | C        | A        | B        | C        | B        | B        | C        | A        | B        | A        | C        | C        | C        | A        | C        | A        | B        | B        | A        | 20 |
| X2        | A        | C        | A        | B        | C        | B        | B        | C        | A        | B        | A        | C        | C        | C        | A        | C        | A        | B        | B        | A        | 20 |
| X3        | A        | C        | A        | B        | C        | B        | B        | C        | A        | B        | A        | C        | C        | C        | A        | C        | A        | B        | B        | A        | 20 |
| X4        | A        | C        | A        | B        | C        | B        | B        | C        | A        | B        | A        | C        | C        | C        | A        | C        | A        | B        | B        | A        | 20 |
| X5        | A        | C        | A        | B        | C        | B        | B        | C        | A        | B        | A        | C        | C        | C        | A        | C        | A        | B        | B        | A        | 20 |
| A1        | A        | C        | A        | B        | C        | B        | B        | C        | A        | B        | A        | C        | C        | C        | A        | C        | A        | B        | B        | A        | 20 |
| A2        | A        | C        | A        | B        | C        | B        | B        | C        | A        | B        | A        | C        | C        | C        | A        | C        | A        | B        | B        | A        | 20 |
| A3        | A        | C        | A        | B        | C        | B        | B        | C        | A        | B        | A        | C        | C        | C        | A        | C        | A        | B        | B        | A        | 20 |
| A4        | A        | C        | A        | B        | C        | B        | B        | C        | A        | B        | A        | C        | C        | C        | A        | C        | A        | B        | B        | A        | 20 |
| A5        | A        | C        | A        | B        | C        | B        | B        | C        | A        | B        | A        | C        | C        | C        | A        | C        | A        | B        | B        | A        | 20 |

|    |   |   |   |   |   |   |   |   |   |   |   |   |   |   |   |   |   |   |   |   |    |
|----|---|---|---|---|---|---|---|---|---|---|---|---|---|---|---|---|---|---|---|---|----|
| P1 | A | C | A | B | C | B | B | C | A | B | A | C | C | C | A | C | A | B | B | A | 20 |
| P2 | A | C | A | B | C | B | B | C | A | B | A | C | C | C | A | C | A | B | B | A | 20 |
| P3 | A | C | A | B | C | B | B | C | A | B | A | C | C | C | A | C | A | B | B | A | 20 |
| P4 | A | C | A | B | C | B | B | C | A | B | A | C | C | C | A | C | A | B | B | A | 20 |
| P5 | A | C | A | B | C | B | B | C | A | B | A | C | C | C | A | C | A | B | B | A | 20 |
| C1 | A | C | A | B | C | B | B | C | A | B | A | C | C | C | A | C | A | B | B | A | 20 |
| C2 | A | C | A | B | C | B | B | C | A | B | A | C | C | C | A | C | A | B | B | A | 20 |
| C3 | A | C | A | B | C | B | B | C | A | B | A | C | C | C | A | C | A | B | B | A | 20 |
| C4 | A | C | A | B | C | B | B | C | A | B | A | C | C | C | A | C | A | B | B | A | 20 |
| C5 | A | C | A | B | C | B | B | C | A | B | A | C | C | C | A | C | A | B | B | A | 20 |

T: Total score

CA: Correct Answers

D: DeepSeek

Q: Qwen

M: Mistral

G: Gemini

X: Grok

A: Claude

P: Copilot

C: ChatGPT

Summary:

795/800 Correct Answers = 99.3%

**Table 2**

Partial conditions, LLMs

|           | 1        | 2        | 3        | 4        | 5        | 6        | 7        | 8        | 9        | 10       | 11       | 12       | 13       | 14       | 15       | 16       | 17       | 18       | 19       | 20       | T  |
|-----------|----------|----------|----------|----------|----------|----------|----------|----------|----------|----------|----------|----------|----------|----------|----------|----------|----------|----------|----------|----------|----|
| <b>CA</b> | <b>A</b> | <b>C</b> | <b>A</b> | <b>B</b> | <b>C</b> | <b>B</b> | <b>B</b> | <b>C</b> | <b>A</b> | <b>B</b> | <b>A</b> | <b>C</b> | <b>C</b> | <b>C</b> | <b>A</b> | <b>C</b> | <b>A</b> | <b>B</b> | <b>B</b> | <b>A</b> |    |
| D1        | A        | C        | A        | B        | C        | B        | B        | C        | A        | B        | A        | C        | C        | C        | A        | C        | A        | B        | B        | A        | 20 |
| D2        | A        | C        | A        | B        | C        | B        | B        | C        | A        | B        | A        | C        | C        | C        | A        | C        | A        | B        | B        | A        | 20 |
| D3        | A        | C        | A        | B        | C        | B        | B        | C        | A        | B        | A        | C        | C        | C        | A        | C        | A        | B        | B        | A        | 20 |
| D4        | A        | C        | A        | B        | C        | B        | B        | C        | A        | B        | A        | C        | C        | C        | A        | C        | A        | B        | B        | A        | 20 |
| D5        | A        | C        | A        | B        | C        | B        | B        | C        | A        | B        | A        | C        | C        | C        | A        | C        | A        | B        | B        | A        | 20 |
| Q1        | A        | C        | A        | B        | C        | B        | B        | C        | A        | B        | A        | C        | C        | C        | B        | C        | A        | B        | B        | A        | 19 |
| Q2        | A        | C        | A        | B        | C        | B        | B        | C        | A        | B        | A        | C        | C        | C        | B        | C        | A        | B        | B        | A        | 19 |
| Q3        | A        | C        | A        | B        | C        | B        | B        | C        | A        | B        | A        | C        | C        | C        | B        | C        | A        | B        | B        | A        | 19 |
| Q4        | A        | C        | A        | B        | C        | B        | B        | C        | A        | B        | A        | C        | C        | C        | B        | C        | A        | B        | B        | A        | 19 |
| Q5        | A        | C        | A        | B        | C        | B        | B        | C        | A        | B        | A        | C        | C        | C        | B        | C        | A        | B        | B        | A        | 19 |
| M1        | A        | C        | A        | B        | C        | B        | B        | C        | A        | B        | A        | C        | C        | C        | A        | C        | A        | B        | B        | A        | 20 |
| M2        | A        | C        | A        | B        | C        | B        | B        | C        | A        | B        | A        | C        | C        | C        | A        | C        | A        | B        | B        | A        | 20 |
| M3        | A        | C        | A        | B        | C        | B        | B        | C        | A        | B        | A        | C        | C        | C        | A        | C        | A        | B        | B        | A        | 20 |
| M4        | A        | C        | A        | B        | C        | B        | B        | C        | A        | B        | A        | C        | C        | C        | A        | C        | A        | B        | B        | A        | 20 |
| M5        | A        | C        | A        | B        | C        | B        | B        | C        | A        | B        | A        | C        | C        | C        | A        | C        | A        | B        | B        | A        | 20 |
| G1        | A        | C        | A        | B        | C        | B        | B        | C        | A        | B        | A        | C        | C        | C        | A        | C        | A        | B        | B        | A        | 20 |
| G2        | A        | C        | A        | B        | C        | B        | B        | C        | A        | B        | A        | C        | C        | C        | A        | C        | A        | B        | B        | A        | 20 |
| G3        | A        | C        | A        | B        | C        | B        | B        | C        | A        | B        | A        | C        | C        | C        | A        | C        | A        | B        | B        | A        | 20 |
| G4        | A        | C        | A        | B        | C        | B        | B        | C        | A        | B        | A        | C        | C        | C        | A        | C        | A        | B        | B        | A        | 20 |
| G5        | A        | C        | A        | B        | C        | B        | B        | C        | A        | B        | A        | C        | C        | C        | A        | C        | A        | B        | B        | A        | 20 |
| X1        | A        | C        | A        | B        | C        | B        | B        | C        | A        | B        | A        | C        | C        | C        | A        | C        | A        | B        | B        | A        | 20 |
| X2        | A        | C        | A        | B        | C        | B        | B        | C        | A        | B        | A        | C        | C        | C        | A        | C        | A        | B        | B        | A        | 20 |
| X3        | A        | C        | A        | B        | C        | B        | B        | C        | A        | B        | A        | C        | C        | C        | A        | C        | A        | B        | B        | A        | 20 |
| X4        | C        | C        | A        | B        | C        | B        | B        | C        | A        | B        | A        | C        | C        | C        | A        | C        | A        | B        | B        | A        | 19 |
| X5        | A        | C        | A        | B        | C        | B        | B        | C        | A        | B        | A        | C        | C        | C        | A        | C        | A        | B        | B        | A        | 20 |
| A1        | A        | C        | A        | B        | C        | B        | B        | C        | A        | B        | A        | C        | C        | C        | A        | C        | A        | B        | B        | A        | 20 |
| A2        | A        | C        | A        | B        | C        | B        | B        | C        | A        | B        | A        | C        | C        | C        | A        | C        | A        | B        | B        | A        | 20 |
| A3        | A        | C        | A        | B        | C        | B        | B        | C        | A        | B        | A        | C        | C        | C        | A        | C        | A        | B        | B        | A        | 20 |
| A4        | A        | C        | A        | B        | C        | B        | B        | C        | A        | B        | A        | C        | C        | C        | A        | C        | A        | B        | B        | A        | 20 |
| A5        | A        | C        | A        | B        | C        | B        | B        | C        | A        | B        | A        | C        | C        | C        | A        | C        | A        | B        | B        | A        | 20 |

|    |   |   |   |   |   |   |   |   |   |   |   |   |   |   |   |   |   |   |   |   |    |
|----|---|---|---|---|---|---|---|---|---|---|---|---|---|---|---|---|---|---|---|---|----|
| P1 | A | C | A | B | C | B | B | C | A | B | A | C | C | C | A | C | A | B | B | A | 20 |
| P2 | A | C | A | B | C | B | B | C | A | B | A | C | C | C | A | C | A | B | B | A | 20 |
| P3 | A | C | A | B | C | B | B | C | A | B | A | C | C | C | A | C | A | B | B | A | 20 |
| P4 | A | C | A | B | C | B | B | C | A | B | A | C | C | C | A | C | A | B | B | A | 20 |
| P5 | A | C | A | B | C | B | B | C | A | B | A | C | C | C | A | C | A | B | B | A | 20 |
| C1 | A | C | A | B | C | B | B | C | A | B | A | C | C | C | A | C | A | B | B | A | 20 |
| C2 | A | C | A | B | C | B | B | C | A | B | A | C | C | C | A | C | A | B | B | A | 20 |
| C3 | A | C | A | B | C | B | B | C | A | B | A | C | C | C | A | C | A | B | B | A | 20 |
| C4 | A | C | A | B | C | B | B | C | A | B | A | C | C | C | A | C | A | B | B | A | 20 |
| C5 | A | C | A | B | C | B | B | C | A | B | A | C | C | C | B | C | A | B | B | A | 19 |

T: Total score

CA: Correct Answers

D: DeepSeek

Q: Qwen

M: Mistral

G: Gemini

X: Grok

A: Claude

P: Copilot

C: ChatGPT

Summary: 793/800 Correct Answers = 99.1%

**Table 3**

Full conditions, humans

|           | 1        | 2        | 3        | 4        | 5        | 6        | 7        | 8        | 9        | 10       | 11       | 12       | 13       | 14       | 15       | 16       | 17       | 18       | 19       | 20       | T  |
|-----------|----------|----------|----------|----------|----------|----------|----------|----------|----------|----------|----------|----------|----------|----------|----------|----------|----------|----------|----------|----------|----|
| <b>CA</b> | <b>A</b> | <b>C</b> | <b>A</b> | <b>B</b> | <b>C</b> | <b>B</b> | <b>B</b> | <b>C</b> | <b>A</b> | <b>B</b> | <b>A</b> | <b>C</b> | <b>C</b> | <b>C</b> | <b>A</b> | <b>C</b> | <b>A</b> | <b>B</b> | <b>B</b> | <b>A</b> |    |
| 1         | B        | B        | B        | C        | A        | B        | C        | A        | B        | A        | C        | C        | B        | C        | A        | B        | A        | C        | B        | A        | 7  |
| 2         | A        | A        | B        | B        | A        | C        | C        | B        | A        | A        | C        | C        | B        | A        | A        | A        | C        | A        | C        | C        | 4  |
| 3         | C        | A        | B        | B        | B        | B        | A        | A        | C        | A        | B        | A        | A        | A        | C        | B        | B        | C        | A        | C        | 2  |
| 4         | A        | A        | A        | A        | B        | C        | C        | A        | A        | C        | C        | B        | A        | C        | A        | C        | C        | A        | C        | A        | 6  |
| 5         | B        | B        | B        | A        | A        | A        | C        | B        | A        | A        | B        | C        | A        | A        | B        | B        | C        | A        | A        | B        | 2  |
| 6         | B        | A        | A        | C        | A        | A        | A        | B        | C        | B        | C        | A        | B        | C        | A        | C        | B        | B        | B        | C        | 7  |
| 7         | A        | B        | C        | C        | A        | A        | B        | B        | C        | A        | C        | A        | B        | A        | C        | C        | A        | A        | C        | C        | 4  |
| 8         | B        | A        | C        | A        | C        | B        | B        | C        | B        | B        | C        | A        | C        | C        | B        | B        | C        | B        | A        | A        | 9  |
| 9         | B        | B        | C        | A        | C        | A        | A        | A        | C        | B        | A        | B        | A        | C        | C        | B        | B        | C        | B        | B        | 5  |
| 10        | C        | B        | A        | A        | C        | A        | A        | B        | B        | A        | A        | C        | C        | A        | A        | C        | B        | A        | C        | A        | 9  |
| 11        | A        | B        | C        | A        | B        | A        | C        | C        | B        | C        | A        | B        | B        | C        | B        | A        | B        | C        | A        | A        | 5  |
| 12        | B        | B        | C        | C        | A        | A        | B        | B        | C        | B        | B        | A        | B        | B        | C        | B        | C        | C        | A        | A        | 3  |
| 13        | A        | B        | A        | C        | C        | A        | C        | A        | A        | B        | C        | C        | B        | C        | A        | B        | B        | B        | B        | A        | 11 |
| 14        | B        | A        | C        | C        | A        | C        | B        | A        | C        | C        | B        | A        | B        | B        | C        | C        | A        | B        | A        | A        | 4  |
| 15        | B        | B        | C        | C        | A        | B        | B        | C        | B        | C        | C        | B        | C        | B        | B        | A        | C        | A        | B        | A        | 6  |
| 16        | C        | C        | B        | A        | C        | A        | C        | B        | B        | A        | C        | C        | B        | B        | C        | B        | C        | B        | C        | C        | 3  |

T: Total score

CA: Correct Answers

1-16: Human participants

Summary:  $87/320 = 27.2\%$ 

Mean: 5.4
