# Supplementary material
Source: Research Square preprint supplement (doi:10.21203/rs.3.rs-9509092/v1)
Supplement: Supplementary file 5 [file 9813af84b1f450e78d5b751c.docx]

# Appendices

Appendix A — Nodjoli-X34 product overview and manual (verbatim)

Appendix B — Nodjoli-X34 certification test, full condition (questions and answer options, with answer key)

Appendix C — Introductory prompt, answer-only condition (verbatim)

Appendix D — Nodjoli-X34 certification test, answer-only condition (answer options only)

Appendix E — Scoring tables (full condition and answer-only condition, LLMs and human participants)

Appendix F — Full model response transcripts (all 80 LLM sessions, unedited)
